# Supplementary material
Source: HighWire-hosted journal article supplement (https://jnm.snmjournals.org/highwire/filestream/94332/field_highwire_adjunct_files/0/99630_Supplemental_Data.pdf)
Supplement: 99630_Supplemental_Data.pdf [file 99630_Supplemental_Data.pdf]

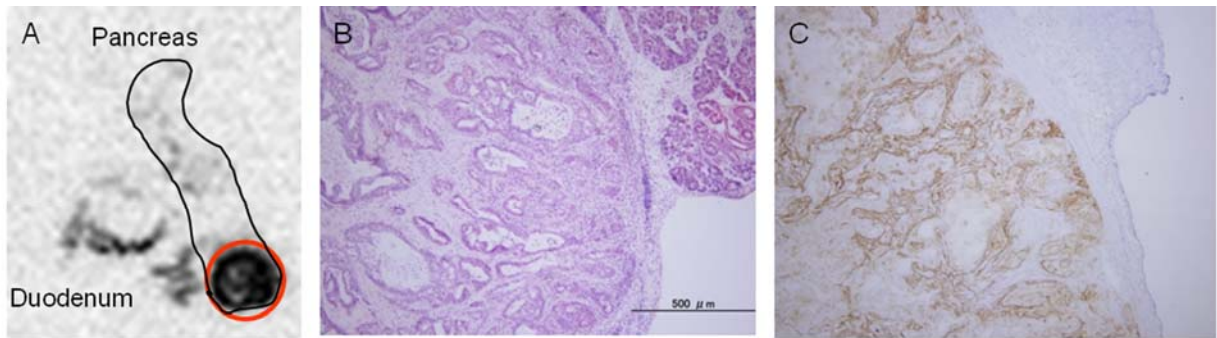

**Supplemental Figure 1.** *Ex vivo* autoradiography of pancreatic gastric lobe in hamster 6. High accumulation of  $^{111}\text{In-DOTA-c(RGDfK)}$  was found in tumor tissue as shown in Fig. 1A (red circle). The adjacent sections were stained with H&E (B) and anti- $\alpha_v\beta_3$  integrin antibody (C). Significant expression of  $\alpha_v\beta_3$  integrin was found in the high accumulation region of  $^{111}\text{In-DOTA-c(RGDfK)}$ .

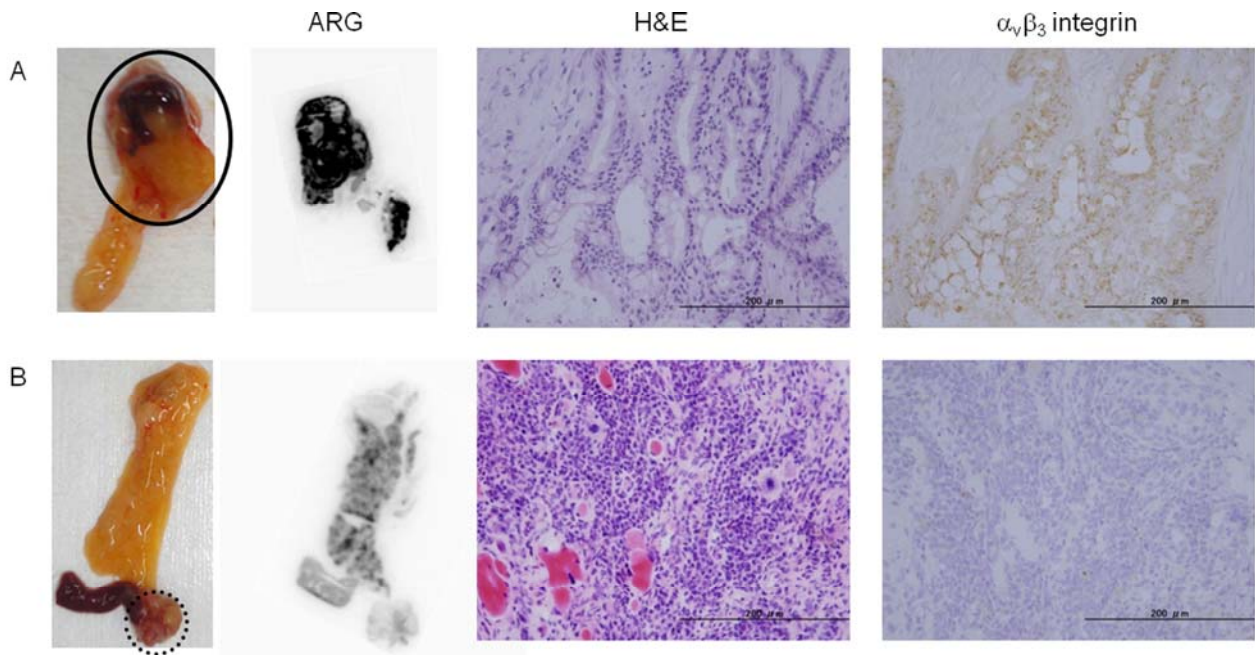

**Supplemental Figure 2.** *Ex vivo* autoradiography and histopathological analyses in hamster 10. Pancreatic tumor in the pancreatic head (A; circle) and purulent inflammatory region in the splenic lobe (B; dotted circle). High accumulation of  $^{111}\text{In-DOTA-c(RGDfK)}$  was found in tumor, but not in inflammatory region by ARG. Sections of a carcinoma and a purulent inflammatory region were stained with H&E and anti- $\alpha_v\beta_3$  integrin antibody. There was no expression of  $\alpha_v\beta_3$  integrin in the inflammatory lesions according to this accumulation pattern.

Supplemental Table 1. Characteristics of hamsters used in this experiment

| Hamster | Weeks after BOP treatment | Tumor stage          | Tumor size |
|---------|---------------------------|----------------------|------------|
| 1       | 16 weeks                  | N. D.                |            |
| 2       | 16 weeks                  | N. D.                |            |
| 3       | 18 weeks                  | Atypical Hyperplasia | 1.5 mm     |
| 4       | 20 weeks                  | Adenocarcinoma       | 2.0 mm     |
| 5       | 22 weeks                  | Adenocarcinoma       | 3.0 mm     |
|         |                           | Adenocarcinoma       | 4.4 mm     |
| 6       | 23 weeks                  | Adenocarcinoma       | 3.0 mm     |
|         |                           | Adenocarcinoma       | 5.0 mm     |
| 7       | 23 weeks                  | Adenocarcinoma       | 2.0 mm     |
|         |                           | Atypical Hyperplasia | 0.7 mm     |
| 8       | 26 weeks                  | N. D.                |            |
| 9       | 34 weeks                  | Adenocarcinoma       | 3.5 mm     |
|         |                           | Adenocarcinoma       | 5.0 mm     |
|         |                           | Atypical Hyperplasia | 0.8 mm     |
|         |                           | Atypical Hyperplasia | 1.3 mm     |
| 10      | 45 weeks                  | Adenocarcinoma       | 8.0 mm     |
|         |                           | Atypical Hyperplasia | 0.9 mm     |

N. D. = not detected.
